# Supplementary material for: Identification of Potential Hub Genes Related to Aflatoxin B1, Liver Fibrosis and Hepatocellular Carcinoma via Integrated Bioinformatics Analysis
Source: MDPI journal article supplement (doi:10.3390/biology12020205), 2023-01-29
Supplement: s1 [file s1]

## Supplementary materials

**Table S1.** GOBP enriched analysis in BUB1B high-expressions group of HCC.

| GOBP Gene set name (BUB1B High group)                        | NES  | NOM p-val | FDR q-val |
|--------------------------------------------------------------|------|-----------|-----------|
| GOBP_CYTOKINETIC_PROCESS                                     | 2.56 | <0.001    | <0.001    |
| GOBP_REGULATION_OF_SPINDLE_ORGANIZATION                      | 2.38 | <0.001    | 0.033     |
| GOBP_NEGATIVE_REGULATION_OF_CELL_CYCLE_G2_M_PHASE_TRANSITION | 2.37 | <0.001    | 0.026     |
| GOBP_CHROMOSOME_LOCALIZATION                                 | 2.36 | <0.001    | 0.02      |
| GOBP_REGULATION_OF_UBIQUITIN_PROTEIN_TRANSFERASE_ACTIVITY    | 2.32 | <0.001    | 0.023     |
| GOBP_REGULATION_OF_CHROMOSOME_ORGANIZATION                   | 2.32 | <0.001    | 0.019     |
| GOBP_METAPHASE_PLATE_CONGRESSION                             | 2.32 | <0.001    | 0.017     |
| GOBP_MITOTIC_CELL_CYCLE_PHASE_TRANSITION                     | 2.32 | <0.001    | 0.015     |
| GOBP_REGULATION_OF_MITOTIC_CELL_CYCLE_PHASE_TRANSITION       | 2.31 | <0.001    | 0.014     |
| GOBP_CYTOKINESIS                                             | 2.31 | <0.001    | 0.012     |

**Table S2.** GOBP enriched analysis in RRM2 high-expressions group of HCC.

| GOBP Gene set name (RRM2 High group)                   | NES  | NOM p-val | FDR q-val |
|--------------------------------------------------------|------|-----------|-----------|
| GOBP_CYTOSKELETON_DEPENDENT_CYTOKINESIS                | 2.65 | <0.001    | <0.001    |
| GOBP_CYTOKINETIC_PROCESS                               | 2.64 | <0.001    | <0.001    |
| GOBP_CYTOKINESIS                                       | 2.61 | <0.001    | <0.001    |
| GOBP_REGULATION_OF_CHROMOSOME_ORGANIZATION             | 2.59 | <0.001    | <0.001    |
| GOBP_CHROMOSOME_LOCALIZATION                           | 2.55 | <0.001    | <0.001    |
| GOBP_MITOTIC_CYTOKINESIS                               | 2.52 | <0.001    | <0.001    |
| GOBP_REGULATION_OF_MITOTIC_CELL_CYCLE_PHASE_TRANSITION | 2.51 | <0.001    | <0.001    |
| GOBP_MITOTIC_CELL_CYCLE_PHASE_TRANSITION               | 2.47 | <0.001    | 0.001     |
| GOBP_REGULATION_OF_CELL_CYCLE_PHASE_TRANSITION         | 2.47 | <0.001    | 0.001     |
| GOBP_DNA_REPLICATION                                   | 2.46 | <0.001    | 0.001     |

**Table S3.** KEGG enriched analysis in the BUB1B high-expressions group of HCC.

| KEGG Gene set name (BUB1B High group)        | NES  | NOM p-val | FDR q-val |
|----------------------------------------------|------|-----------|-----------|
| KEGG_CELL_CYCLE                              | 0.7  | 2.17      | < 0.0001  |
| KEGG_OOCYTE_MEIOSIS                          | 0.58 | 2.1       | < 0.0001  |
| KEGG_NUCLEOTIDE_EXCISION_REPAIR              | 0.51 | 2.03      | 0.008     |
| KEGG_DNA_REPLICATION                         | 0.77 | 2.02      | < 0.0001  |
| KEGG_MISMATCH_REPAIR                         | 0.69 | 1.99      | < 0.0001  |
| KEGG_HOMOLOGOUS_RECOMBINATION                | 0.77 | 1.91      | < 0.0001  |
| KEGG_P53_SIGNALING_PATHWAY                   | 0.52 | 1.85      | < 0.0001  |
| KEGG_BASE_EXCISION_REPAIR                    | 0.5  | 1.75      | 0.036     |
| KEGG_PROGESTERONE_MEDIATED_OOCYTE_MATURATION | 0.51 | 1.72      | 0.004     |
| KEGG_UBIQUITIN_MEDIATED_PROTEOLYSIS          | 0.3  | 1.68      | 0.029     |

**Table S4.** KEGG enriched analysis in RRM2 high-expressions group of HCC.

| KEGG Gene set name (RRM2High group)          | NES  | NOM p-val | FDR q-val |
|----------------------------------------------|------|-----------|-----------|
| KEGG_OOCYTE_MEIOSIS                          | 0.63 | 2.27      | < 0.0001  |
| KEGG_CELL_CYCLE                              | 0.75 | 2.26      | < 0.0001  |
| KEGG_P53_SIGNALING_PATHWAY                   | 0.61 | 2.15      | < 0.0001  |
| KEGG_DNA_REPLICATION                         | 0.79 | 2.09      | < 0.0001  |
| KEGG_HOMOLOGOUS_RECOMBINATION                | 0.83 | 2.05      | < 0.0001  |
| KEGG_NUCLEOTIDE_EXCISION_REPAIR              | 0.52 | 2.03      | 0.004     |
| KEGG_MISMATCH_REPAIR                         | 0.69 | 2.02      | < 0.0001  |
| KEGG_PROGESTERONE_MEDIATED_OOCYTE_MATURATION | 0.58 | 1.95      | < 0.0001  |
| KEGG_BASE_EXCISION_REPAIR                    | 0.54 | 1.89      | 0.02      |
| KEGG_RNA_DEGRADATION                         | 0.39 | 1.86      | 0.006     |

**Table S5.** The relationships between BUB1B expression and patients' clinical features in LIHC TCGA database.

| Characteristics                      | Categories    | BUB1B expression |                | p value |
|--------------------------------------|---------------|------------------|----------------|---------|
|                                      |               | High expression  | Low expression |         |
| Gender                               | male          | 132              | 119            | 0.987   |
|                                      | female        | 63               | 57             |         |
| Adjacent hepatic tissue inflammation | No            | 59               | 59             | 0.219   |
|                                      | yes           | 57               | 61             |         |
| Age                                  | > 60          | 91               | 104            | 0.017   |
|                                      | ≤60           | 105              | 73             |         |
| Fibrosis Ishak score                 | No fibrosis   | 28               | 47             | 0.006   |
|                                      | With fibrosis | 31               | 28             |         |
|                                      | Cirrhosis     | 43               | 37             |         |
| Grade                                | G1, G2        | 97               | 138            | < 0.001 |
|                                      | G3, G4        | 99               | 39             |         |
| T Stage                              | T1            | 81               | 108            | < 0.001 |
|                                      | T2            | 57               | 50             |         |
|                                      | T3, T4        | 58               | 19             |         |
| Survival status                      | Alive         | 119              | 124            | 0.059   |
|                                      | Dead          | 77               | 53             |         |
| Race                                 | Asian         | 97               | 62             | 0.037   |
|                                      | Non- Asian    | 99               | 105            |         |
| Tumor stage                          | I             | 78               | 94             | 0.02    |
|                                      | II            | 50               | 37             |         |
|                                      | III, IV       | 56               | 34             |         |

**Table S6.** The relationships between RRM2 expression and patients' clinical features in LIHC TCGA database.

| Characteristics                      | Categories    | BUB1B expression |                | p value |
|--------------------------------------|---------------|------------------|----------------|---------|
|                                      |               | High expression  | Low expression |         |
| Gender                               | male          | 139              | 113            | 0.345   |
|                                      | female        | 73               | 48             |         |
| Adjacent hepatic tissue inflammation | No            | 59               | 59             | 0.434   |
|                                      | yes           | 65               | 53             |         |
| Age                                  | > 60          | 95               | 100            | 0.001   |
|                                      | ≤60           | 117              | 61             |         |
| Fibrosis Ishak score                 | No fibrosis   | 32               | 43             | 0.092   |
|                                      | With fibrosis | 34               | 25             |         |
|                                      | Cirrhosis     | 47               | 33             |         |
| Grade                                | G1, G2        | 114              | 121            | < 0.001 |
|                                      | G3, G4        | 98               | 40             |         |
| T Stage                              | T1            | 86               | 98             | 0.001   |
|                                      | T2            | 65               | 31             |         |
|                                      | T3, T4        | 61               | 32             |         |
| Survival status                      | Alive         | 129              | 113            | 0.061   |
|                                      | Dead          | 83               | 48             |         |
| Race                                 | Asian         | 107              | 52             | 0.001   |
|                                      | Non- Asian    | 101              | 104            |         |
| Tumor stage                          | I             | 84               | 88             | 0.007   |
|                                      | II            | 58               | 29             |         |
|                                      | III, IV       | 58               | 32             |         |

**Table S7.** Univariate analysis and multivariate analysis of factors of overall survival OS of LIH TCGA in BUB1B expression.

| Variables                            | Category               | Univariate analysis |             |         | Multivariate analysis |              |         |
|--------------------------------------|------------------------|---------------------|-------------|---------|-----------------------|--------------|---------|
|                                      |                        | HR                  | 95%CI       | P value | HR                    | 95%CI        | P value |
| BUB1B                                | Low vs High            | 1.200               | 1.100–1.400 | <0.001  | 1.239                 | 1.107- 1.386 | 0.00019 |
| Age                                  | ≤65, >65               | 0.810               | 0.570–1.100 | 0.230   |                       |              |         |
| Gender                               | Male vs Female         | 1.100               | 0.780–1.600 | 0.500   |                       |              |         |
| Adjacent hepatic tissue inflammation | Yes, NO                | 0.640               | 0.400–1.000 | 0.076   |                       |              |         |
| Fibrosis ishak score                 | Cirrross               | 0.870               | 0.650–1.200 | 0.350   |                       |              |         |
| Grade                                | G1-G2 vs G3-G4         | 0.970               | 0.670–1.400 | 0.880   |                       |              |         |
| Tumor stage                          | Stage I- II vs III -IV | 1.200               | 0.790–1.800 | 0.420   |                       |              |         |
| T Stage                              | T1-T2 vs T3-4          | 1.600               | 1.100–2.400 | 0.009   | 1.631                 | 1.116-2.38   | 0.011   |
| N Stage                              | N0 vs N1               | 1.500               | 1.000–2.200 | 0.035   | 1.443                 | 0.840-2.478  | 0.183   |
| M Stage                              | M0 vs M1               | 1.600               | 1.100–2.300 | 0.013   | 1.367                 | 0.797-2.344  | 0.255   |

**Table S8.** Univariate analysis and multivariate analysis of factors of overall survival OS of LIH TCGA in RRM2 expression.

| Variables                            | Category                                       | Univariate analysis |             |         | Multivariate analysis |             |         |
|--------------------------------------|------------------------------------------------|---------------------|-------------|---------|-----------------------|-------------|---------|
|                                      |                                                | HR                  | 95%CI       | P value | HR                    | 95%CI       | P value |
| RRM2                                 | Low vs High                                    | 1.300               | 1.100–1.500 | <0.001  | 1.289                 | 1.126- 1.47 | 0.00022 |
| Age at initial pathologic diagnosis  | ≤65, >65                                       | 0.810               | 0.570–1.100 | 0.230   |                       |             |         |
| Gender demographic                   | Male vs Female                                 | 1.100               | 0.780–1.600 | 0.500   |                       |             |         |
| Adjacent hepatic tissue inflammation | Yes, NO                                        | 0.640               | 0.400–1.000 | 0.076   |                       |             |         |
| Fibrosis ishak score                 | With Fibross, complete and incomplete cirrhoss | 0.870               | 0.650–1.200 | 0.350   |                       |             |         |
| Neoplasm histologic grade            | G1-G2 vs G3-G4                                 | 0.970               | 0.670–1.400 | 0.880   |                       |             |         |
| Vascular tumor cell type             | Male, Female                                   | 1.100               | 0.720–1.700 | 0.650   |                       |             |         |
| Tumor stage diagnoses                | Stage I- II vs III -IV                         | 1.200               | 0.790–1.800 | 0.420   |                       |             |         |
| pathologic _T                        | T1-T2 vs T3-4                                  | 1.600               | 1.100–2.400 | 0.009   | 1.623                 | 1.110- 2.37 | 0.0124  |
| pathologic _N                        | N0 vs N1                                       | 1.500               | 1.000–2.200 | 0.035   | 1.349                 | 0.83- 2.49  | 0.28    |
| pathologic _M                        | M0 vs M1                                       | 1.600               | 1.100–2.300 | 0.013   | 1.438                 | 0.830- 2.49 | 0.194   |

**Table S9.** Univariate analysis and multivariate analysis of factors of disease specific survival DSS of LIH TCGA in BUB1B expression.

| Variables                            | Category                                       | Univariate analysis |             |         | Multivariate analysis |            |         |
|--------------------------------------|------------------------------------------------|---------------------|-------------|---------|-----------------------|------------|---------|
|                                      |                                                | HR                  | 95%CI       | P value | HR                    | 95%CI      | P value |
| BUB1B                                | Low vs High                                    | 1.300               | 1.100–1.500 | <0.001  | 1.307                 | 1.126-1.51 | 0.0004  |
| Age at initial pathologic diagnosis  | <=65, >65                                      | 1.200               | 0.760–1.900 | 0.420   |                       |            |         |
| Gender                               | Male vs Female                                 | 1.300               | 0.820–2.100 | 0.260   |                       |            |         |
| Adjacent hepatic tissue inflammation | Yes, NO                                        | 0.630               | 0.330–1.200 | 0.140   |                       |            |         |
| Fibrosis ishak score                 | With Fibross, complete and incomplete cirrhoss | 0.920               | 0.640–1.300 | 0.640   |                       |            |         |
| Neoplasm histologic grade            | G1-G2 vs G3-G4                                 | 1.200               | 0.730–1.800 | 0.540   |                       |            |         |
| Vascular tumor cell type             | Male, Female                                   | 1.400               | 0.790–2.400 | 0.260   |                       |            |         |
| Tumor stage diagnoses                | Stage I- II vs III -IV                         | 1.300               | 0.790–2.200 | 0.290   |                       |            |         |
| pathologic _T                        | T1-T2 vs T3-4                                  | 1.900               | 1.200–3.000 | 0.007   | 1.885                 | 1.167-3.04 | 0.0095  |
| pathologic _N                        | N0 vs N1                                       | 1.700               | 1.100–2.700 | 0.028   | 1.552                 | 0.78- 3.07 | 0.207   |
| pathologic _M                        | M0 vs M1                                       | 1.800               | 1.100–2.900 | 0.016   | 1.503                 | 0.755-2.99 | 0.246   |

**Table S10.** Univariate analysis and multivariate analysis of factors of disease specific survival DSS of LIH TCGA in RRM2 expression.

| Variables                            | Category                                       | Univariate analysis |             |         | Multivariate analysis |             |         |
|--------------------------------------|------------------------------------------------|---------------------|-------------|---------|-----------------------|-------------|---------|
|                                      |                                                | HR                  | 95%CI       | P value | HR                    | 95%CI       | P value |
| RRM2                                 | Low vs High                                    | 1.400               | 1.100–1.600 | <0.001  | 1.375                 | 1.151- 1.64 | 0.00044 |
| Age at initial pathologic diagnosis  | <=65, >65                                      | 1.200               | 0.760–1.900 | 0.420   |                       |             |         |
| Gender                               | Male vs Female                                 | 1.300               | 0.820–2.100 | 0.260   |                       |             |         |
| Adjacent hepatic tissue inflammation | Yes, NO                                        | 0.630               | 0.330–1.200 | 0.140   |                       |             |         |
| Fibrosis ishak score                 | With Fibross, complete and incomplete cirrhoss | 0.920               | 0.640–1.300 | 0.640   |                       |             |         |
| Neoplasm histologic grade            | G1-G2 vs G3-G4                                 | 1.200               | 0.730–1.800 | 0.540   |                       |             |         |
| Vascular tumor cell type             | Male, Female                                   | 1.400               | 0.790–2.400 | 0.260   |                       |             |         |
| Tumor stage diagnoses                | Stage I- II vs III -IV                         | 1.300               | 0.790–2.200 | 0.290   |                       |             |         |
| pathologic _T                        | T1-T2 vs T3-4                                  | 1.900               | 1.200–3.000 | 0.007   | 1.840                 | 1.135- 2.98 | 0.0132  |
| pathologic _N                        | N0 vs N1                                       | 1.700               | 1.100–2.700 | 0.028   | 1.537                 | 0.763-3.09  | 0.2284  |
| pathologic _M                        | M0 vs M1                                       | 1.1                 | 0.68-1.7    | 0.016   | 1.467                 | 0.72- 2.968 | 0.2860  |

**Table S11.** Univariate analysis and multivariate analysis of factors of Progression free interval PFI of LIH TCGA in BUB1B expression.

| Variables                            | Category                                       | Univariate analysis |             |         | Multivariate analysis |            |         |
|--------------------------------------|------------------------------------------------|---------------------|-------------|---------|-----------------------|------------|---------|
|                                      |                                                | HR                  | 95%CI       | P value | HR                    | 95%CI      | P value |
| BUB1B                                | Low vs High                                    | 1.200               | 1.100–1.300 | <0.001  | 1.191                 | 1.08-1.305 | 0.00018 |
| Age at initial pathologic diagnosis  | <=65, >65                                      | 1.100               | 0.810–1.500 | 0.580   |                       |            |         |
| Gender                               | Male vs Female                                 | 1.300               | 0.920–1.700 | 0.150   |                       |            |         |
| Adjacent hepatic tissue inflammation | Yes, NO                                        | 0.790               | 0.550–1.100 | 0.200   |                       |            |         |
| Fibrosis ishak score                 | With Fibross, complete and incomplete cirrhoss | 0.950               | 0.760–1.200 | 0.660   |                       |            |         |
| Neoplasm histologic grade            | G1-G2 vs G3-G4                                 | 1.200               | 0.850–1.600 | 0.350   |                       |            |         |
| Vascular tumor cell type             | Male, Female                                   | 1.300               | 0.930–1.800 | 0.120   |                       |            |         |
| Tumor stage diagnoses                | Stage I- II vs III -IV                         | 1.100               | 0.760–1.500 | 0.680   |                       |            |         |
| pathologic _T                        | T1-T2 vs T3-4                                  | 1.600               | 1.100–2.200 | 0.007   | 1.498                 | 1.08- 2.07 | 0.0148  |

|              |          |       |             |       |
|--------------|----------|-------|-------------|-------|
| pathologic_N | N0 vs N1 | 1.200 | 0.880–1.700 | 0.250 |
| pathologic_M | M0 vs M1 | 1.200 | 0.860–1.600 | 0.310 |

**Table S12.** Univariate analysis and multivariate analysis of factors of Progression free interval PFI of LIH TCGA in RRM2 expression.

| Variables                            | Category                                       | Univariate analysis |             |         | Multivariate analysis |            |         |
|--------------------------------------|------------------------------------------------|---------------------|-------------|---------|-----------------------|------------|---------|
|                                      |                                                | HR                  | 95%CI       | P value | HR                    | 95%CI      | P value |
| RRM2                                 | Low vs High                                    | 1.200               | 1.100–1.300 | 0.001   | 0.69                  | 0.51- 0.93 | 0.016   |
| Age at initial pathologic diagnosis  | <=65, >65                                      | 1.100               | 0.810–1.500 | 0.580   |                       |            |         |
| Gender                               | Male vs Female                                 | 1.300               | 0.920–1.700 | 0.150   |                       |            |         |
| Adjacent hepatic tissue inflammation | Yes, NO                                        | 0.790               | 0.550–1.100 | 0.200   |                       |            |         |
| Fibrosis ishak score                 | With Fibross, complete and incomplete cirrhoss | 0.950               | 0.760–1.200 | 0.660   | 1.21                  | 1.00- 1.45 | 0.046   |
| Neoplasm histologic grade            | G1-G2 vs G3-G4                                 | 1.200               | 0.850–1.600 | 0.350   |                       |            |         |
| Vascular tumor cell type             | Male, Female                                   | 1.300               | 0.930–1.800 | 0.120   |                       |            |         |
| Tumor stage diagnoses                | Stage I- II vs III -IV                         | 1.100               | 0.760–1.500 | 0.680   |                       |            |         |
| pathologic_T                         | T1-T2 vs T3-4                                  | 1.600               | 1.100–2.200 | 0.007   | 1.47                  | 1.06- 2.01 | 0.018   |
| pathologic_N                         | N0 vs N1                                       | 1.200               | 0.880–1.700 | 0.250   |                       |            |         |
| pathologic_M                         | M0 vs M1                                       | 1.200               | 0.860–1.600 | 0.310   |                       |            |         |
